# Supplementary material
Source: Springer Nature journal article supplement (https://www.springermedizin.de/resource/supplementary/13063_2007_209_MOESM2_ESM.pdf/9622298)

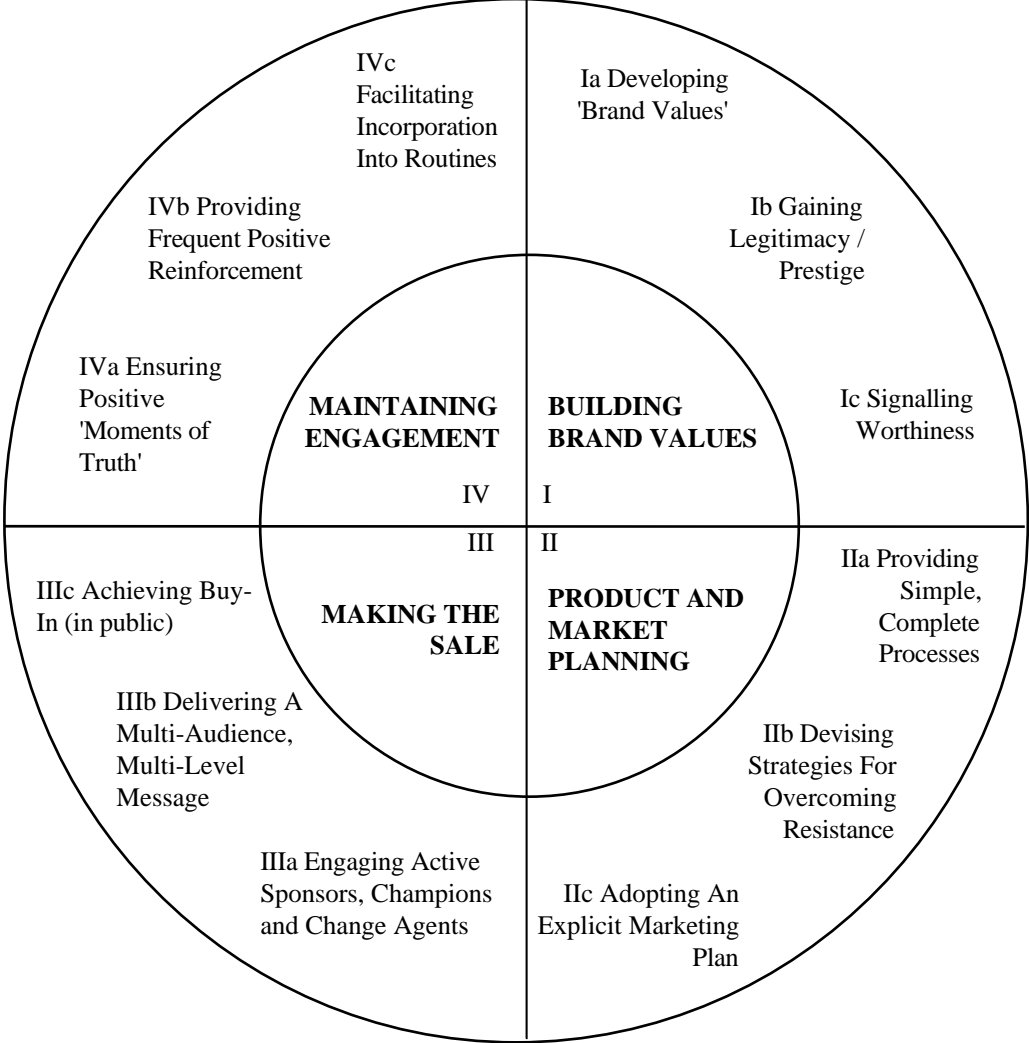

Supplement: MOESM2 [file 9622298]
